# Supplementary material
Source: Springer Nature journal article supplement (https://www.springermedizin.de/resource/supplementary/13054_2004_3027_MOESM1_ESM.pdf/9719564)
Supplement: MOESM1 [file 9719564]

## Additional file

### The questionnaire

#### Questions about the hospital structure

1. Number of beds of the hospital
2. Structure of the intensive care unit
  - a) Number of beds \_\_\_\_\_ beds
  - b) Number of patients \_\_\_\_\_ patients per year
  - c) Number of patient care days \_\_\_\_\_ patient care days per year
  - d) Portion of ventilated patients \_\_\_\_\_ %
  - e) Number of anesthetics per year \_\_\_\_\_

#### Questions on the practice of sedation and analgesia

1. Do you use routinely a sedation scale (e.g. Ramsay)?
2. Which sedation scale do you use?
3. Do you use routinely neuromuscular blockade for sedated and ventilated patients?
4. Do you attempt to create a day-night rhythm?
5. Do you have put down a sedation management in writing?
6. On how many percent of patients with analgesia and sedation do you experience a transitional syndrome/delir (estimate)?
7. Do costs play a role in the selection of agents for sedation?
8. Does the expected duration for sedation play a role in the selection of agents for sedation?
9. Which medication or technique do you use for analgesia and sedation up to 24 h, 24 to 72 h, > 72 h and for weaning?

| Sedation                                            | Analgesia                             | Miscellaneous                             |
|-----------------------------------------------------|---------------------------------------|-------------------------------------------|
| <b>Medication</b>                                   | <b>Medication</b>                     | <b>Medication</b>                         |
| Midazolam <input type="checkbox"/>                  | Morphine <input type="checkbox"/>     | Epidural <input type="checkbox"/>         |
| Propofol <input type="checkbox"/>                   | Fentanyl <input type="checkbox"/>     | Peripheral block <input type="checkbox"/> |
| Methohexital <input type="checkbox"/>               | Sufentanil <input type="checkbox"/>   | Clonidine <input type="checkbox"/>        |
| Gamma-hydroxy-butyric acid <input type="checkbox"/> | Alfentanil <input type="checkbox"/>   | PCA <input type="checkbox"/>              |
| Diazepam <input type="checkbox"/>                   | Remifentanil <input type="checkbox"/> | PCEA <input type="checkbox"/>             |
| Lorazepam <input type="checkbox"/>                  | Piritramid <input type="checkbox"/>   | NMB <input type="checkbox"/>              |
| Miscellaneous <input type="checkbox"/>              | Ketamine (S) <input type="checkbox"/> | Miscellaneous <input type="checkbox"/>    |
|                                                     | NSAIDs <input type="checkbox"/>       |                                           |
|                                                     | <input type="checkbox"/>              |                                           |

The above table was used four times for every sedation period respectively. Abbreviations: NSAIDs = Non-steroidal anti-inflammatory drugs, PCA = patient controlled analgesia, PCEA = patient controlled epidural analgesia, NMB = neuromuscular blocking agents. Multiple choices were possible
